# Supplementary material
Source: Springer Nature journal article supplement (https://www.springermedizin.de/resource/supplementary/12936_2008_783_MOESM4_ESM.pdf/9548900)

★ P < 0.001

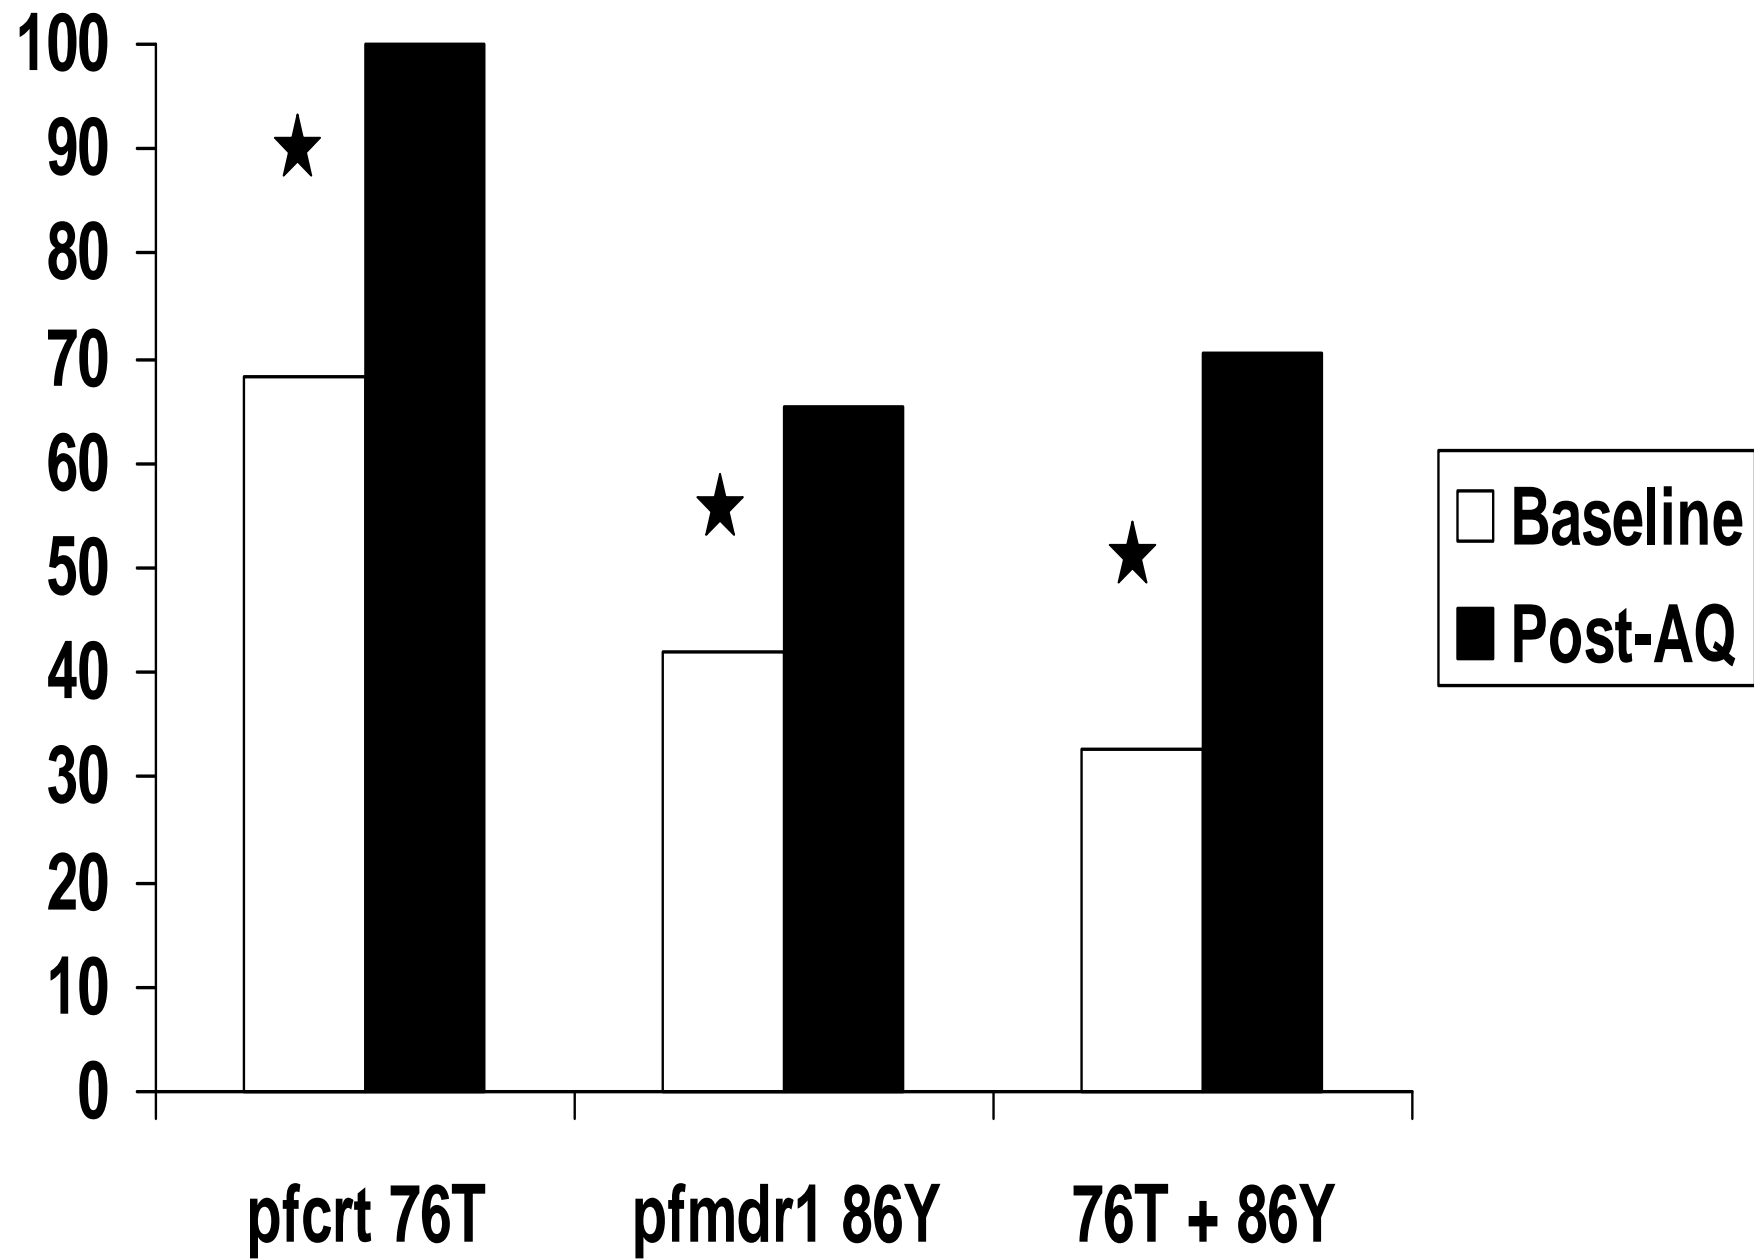

Supplement: MOESM4 [file 9548900]
